# Supplementary material
Source: PubMed Central journal article supplement (PMC5992501)
Supplement: NIHMS956499-supplement-Supplement.pdf [file NIHMS956499-supplement-Supplement.pdf]

## Supplementary Figure Legends

**Supplementary Figure S1. Protective efficacy of B10 in mice.** Groups of Balb/c mice (N=5/group) received a single infusion of 6.25, 3.12, 1.56, 0.78, 0.39, 0.19, 0.097, 0.048, and 0  $\mu$ g B10 and were subsequently challenged by the i.v. route with  $10^5$  VP ( $10^2$  PFU). Serum viral loads are shown on days 0, 1, 2, 3, 4, and 7. Assay sensitivity 100 copies/ml. Mouse studies were performed twice.

**Supplementary Figure S2. Viral loads in colorectal mucosa following ZIKV infection.** Rhesus monkeys (N=4/group) received 10 mg/kg B10 or the isotype matched sham control antibody PGT121 by the i.v. route on day -1 or day +2 as shown in Figure 2. All animals were challenged on day 0 by the s.c route with  $10^6$  VP ( $10^3$  PFU) ZIKV-BR. Viral loads are shown in colorectal biopsies on days 0, 3, 7, and 14. Assay sensitivity 100 copies/ml or  $1 \times 10^6$  cells. Arrows designate the day +2 infusions.

**Supplementary Figure S3. Cellular immune responses.** IFN- $\gamma$  ELISPOT assays using Env, NS1, Cap, and prM peptide pools were performed in rhesus monkeys at week 2 following ZIKV challenge. Spot-forming cells (SFC) per  $10^6$  PBMC are shown for each sample as the mean of n=3 biologically independent assays. The red bars indicate median responses for each group of animals.

**Supplementary Figure S4. Sequence of prM-Env in CSF virus from monkey 12-083.** Identical sequences of prM-Env from the ZIKV-BR challenge stock and the day 14 CSF

virus (monkey 12-083) are shown. A single amino acid mutation (shown in red) was observed for both sequences compared with the Brazil ZKV2015 sequence (Genbank KU497555.1). Blue indicates region not sequenced.

**Supplementary Figure S5. In vitro selection of ZIKV with B10 and C8.** We performed 10 passages of three ZIKV strains (PF13, PE243, HD78788) with escalating concentrations of B10 or C8 antibodies, at 0.002, 0.015, and 0.070  $\mu\text{g/ml}$  (corresponding to FRNT50, FRNT90, and FRNT99) for 2, 3, and 5 passages, respectively. Virus neutralization assays were then performed to determine the resistance of parental vs. B10/C8-selected passaged ZIKV viruses to neutralization. Data are representative of  $n=3$  biologically independent experiments, and mean  $\pm$  SEM values are shown. ZIKV Env sequences of parental and B10/C8-selected passaged virus were also determined.

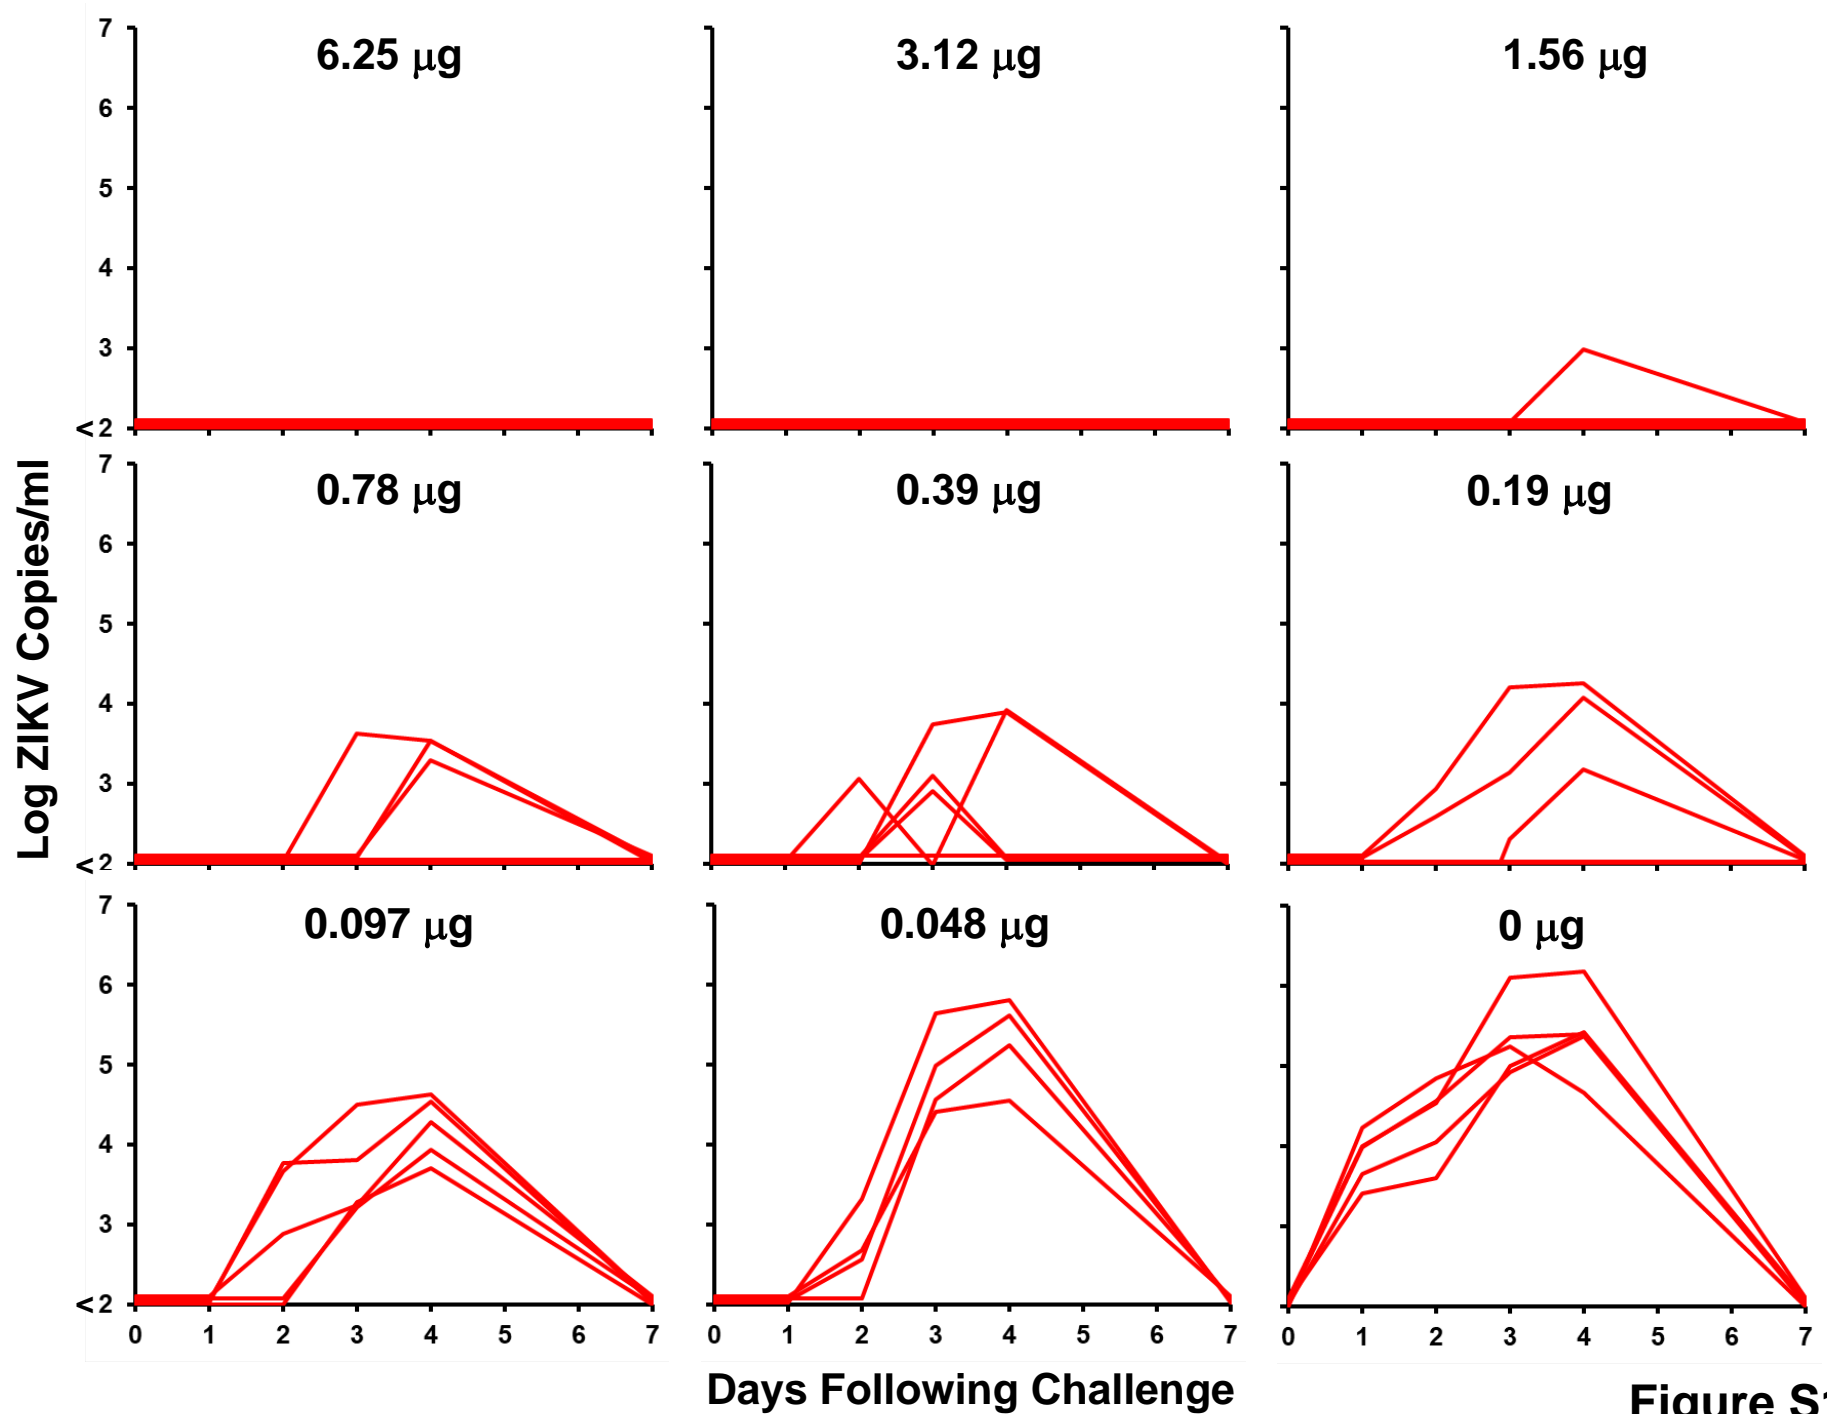

Figure S1

# Colorectal Mucosa

Day -1

Day +2

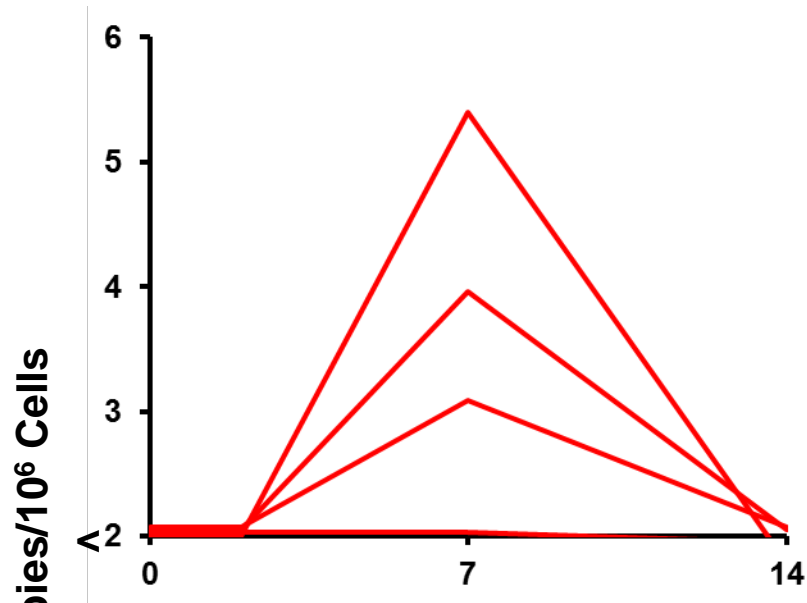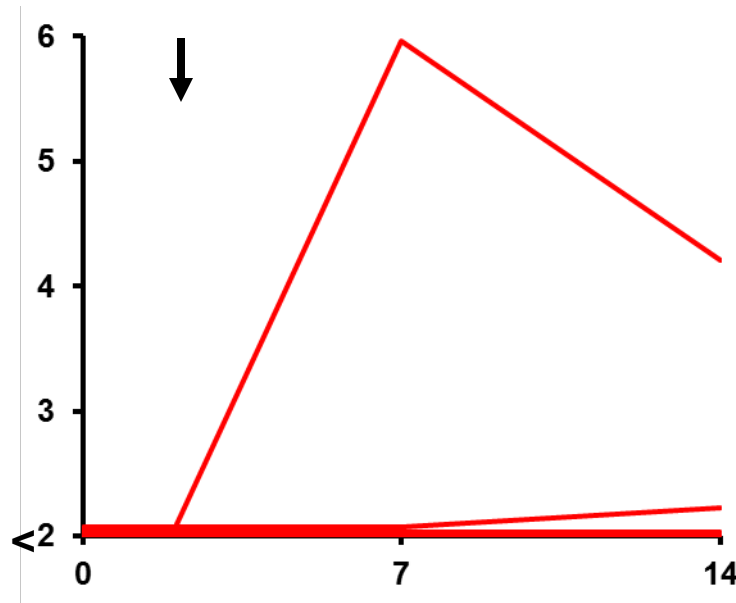

Sham

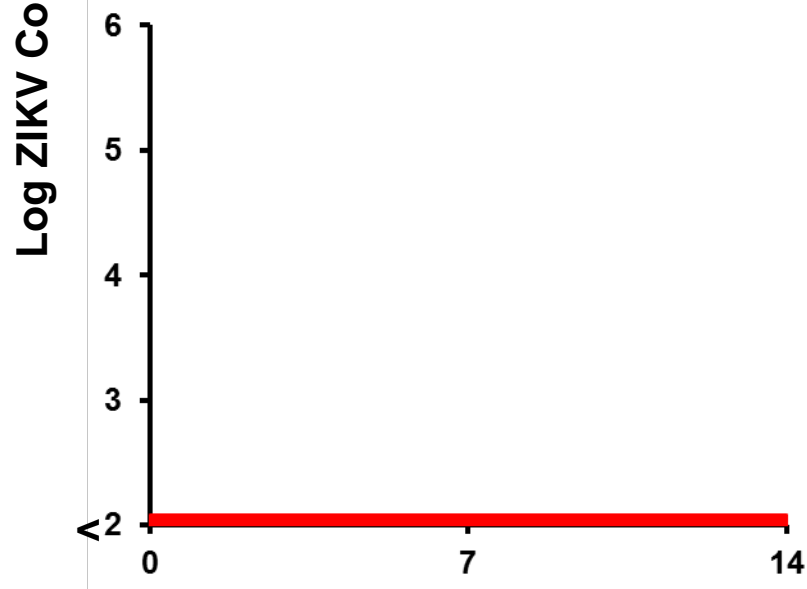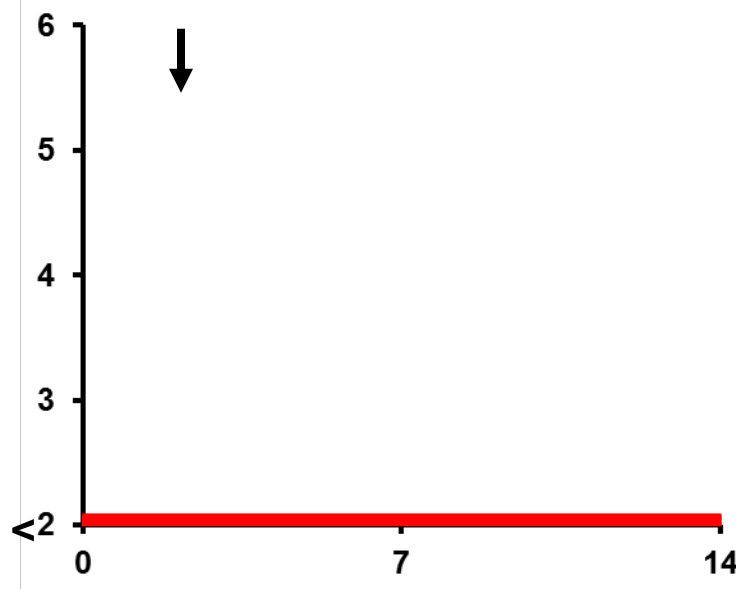

B10

Days Following Challenge

Figure S2

Day -1

Day +2

Sham

B10

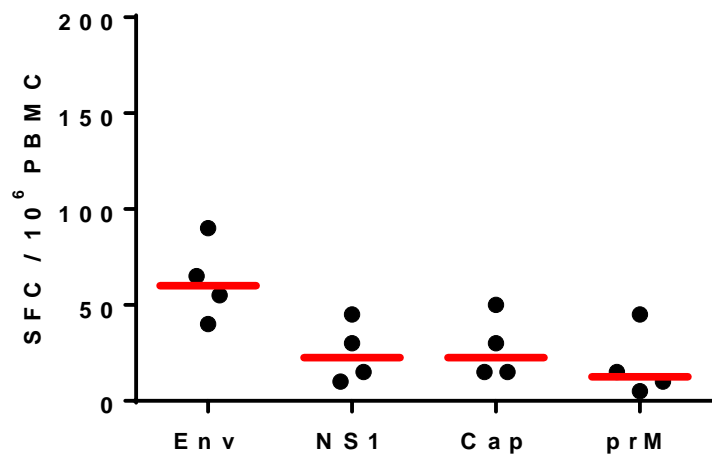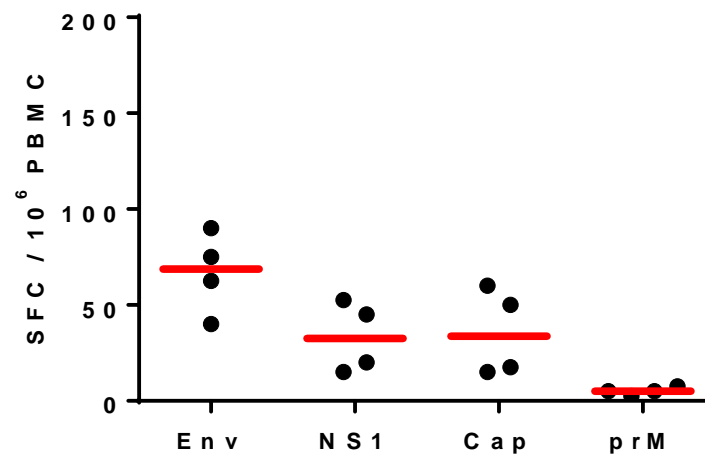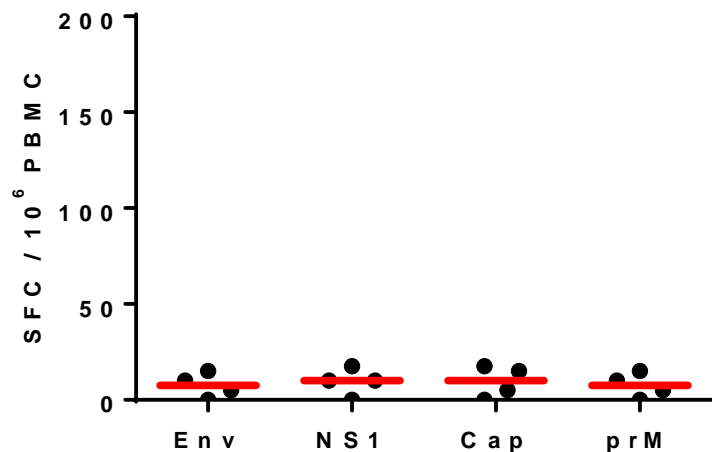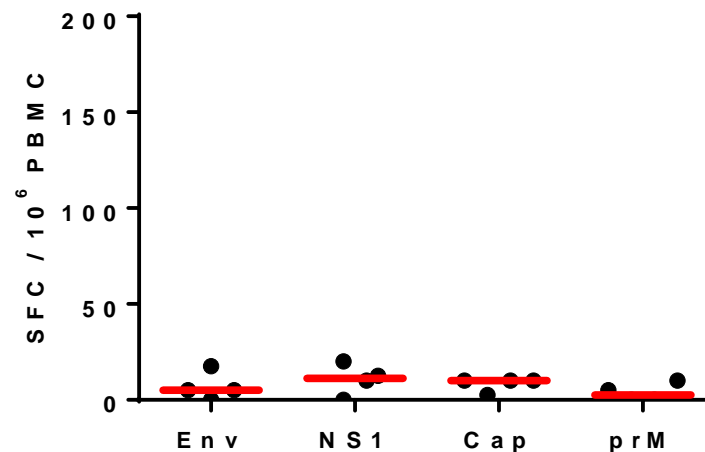

Figure S3

## Brazil ZKV2015 prM-Env Sequence (Genbank KU497555.1)

AVTLPSHSTRKLQTRSQTWLESREYTKHLIRVENWIFRNPGFALAAAAIAWLLGSSTSQKVIYLV MILLIAPAYSIRCIGVSN  
RDFVEGMSGGTWVDVVLEHGGCVTVMAQDKPTVDIELVTTT VSNMAEVRSYCYEASISDMASD SRCPTQGEAYLDKQSDTQYV  
CKRTLVD R GWNGCGLFGK GSLV TCAKFACSKKMTGKSIQ PENLEYRIMLSVHGSQHSGMIVNDTGHETDENRAKVEITPNSP  
RAEATLGGFGSLGLDCEPRTGLDFSDLYYLT MN NKHWLVHKEWFHD I PLPWHAGADTGT PHWNNKEALVEFKDAHAKRQTVV  
LGTQEGAVHTALAGALEAEMDGAKGRLSSGHLKCR LKMDKLR LKGVSYSLCTAAFTFTKIP AETLHGTVTVEVQYAGTDGPCK  
VPAQMAVDMQTLTPVGRLITANPVITESTENSKM MLELDPPFGDSYIVIGVGEKKI THHWHRSGSTIGKAFEATVRGAKRMAV  
LGD TAWDFG SVGGALNSLGKGIHQIFGAAFKSLFGGMSWFSQILIGTLLMWLGLNTKNGSISLMCLALGGVLI FLSTAVSA

## ZIKV-BR Challenge Stock prM-Env Sequence

AVTLPSHSTRKLQTRSQTWLESREYTKHLIRVENWIFRNPGFALAAAAIAWLLGSSTSQKVIYLV MILLIAPAYSIRCIGVSN  
RDFVEGMSGGTWVDVVLEHGGCVTVMAQDKPTVDIELVTTT VSNMAEVRSYCYEASISDMASD SRCPTQGEAYLDKQSDTQYV  
CKRTLVD R GWNGCGLFGK GSLV TCAKFACSKKMTGKSIQ PENLEYRIMLSVHGSQHSGMIVNDTGHETDENRAKVEITPNSP  
RAEATLGGFGSLGLDCEPRTGLDFSDLYYLT MN NKHWLVHKEWFHD I PLPWHAGADTGT PHWNNKEALVEFKDAHAKRQTVV  
LGSQEGAVHTALAGALEAEMDGAKGRLSSGHLKCR LKMDKLR LKGVSYSLCTAAFTFTKIP AETLHGTVTVEVQYAGTDGPCK  
VPAQMAVDMQTLTPVGRLITANPVITESTENSKM MLELDPPFGDSYIVIGVGEKKI THHWHRSGSTIGKAFEATVRGAKRMAV  
LGD TAWDFG SVGGALNSLGKGIHQIFGAAFKSLFGGMSWFSQILIGTLLMWLGLNTKNGSISLMCLALGGVLI FLSTAVSA

## CSF Day 14 (Monkey 12-083) prM-Env Sequence

AVTLPSHSTRKLQTRSQTWLESREYTKHLIRVENWIFRNPGFALAAAAIAWLLGSSTSQKVIYLV MILLIAPAYSIRCIGVSN  
RDFVEGMSGGTWVDVVLEHGGCVTVMAQDKPTVDIELVTTT VSNMAEVRSYCYEASISDMASD SRCPTQGEAYLDKQSDTQYV  
CKRTLVD R GWNGCGLFGK GSLV TCAKFACSKKMTGKSIQ PENLEYRIMLSVHGSQHSGMIVNDTGHETDENRAKVEITPNSP  
RAEATLGGFGSLGLDCEPRTGLDFSDLYYLT MN NKHWLVHKEWFHD I PLPWHAGADTGT PHWNNKEALVEFKDAHAKRQTVV  
LGSQEGAVHTALAGALEAEMDGAKGRLSSGHLKCR LKMDKLR LKGVSYSLCTAAFTFTKIP AETLHGTVTVEVQYAGTDGPCK  
VPAQMAVDMQTLTPVGRLITANPVITESTENSKM MLELDPPFGDSYIVIGVGEKKI THHWHRSGSTIGKAFEATVRGAKRMAV  
LGD TAWDFG SVGGALNSLGKGIHQIFGAAFKSLFGGMSWFSQILIGTLLMWLGLNTKNGSISLMCLALGGVLI FLSTAVSA

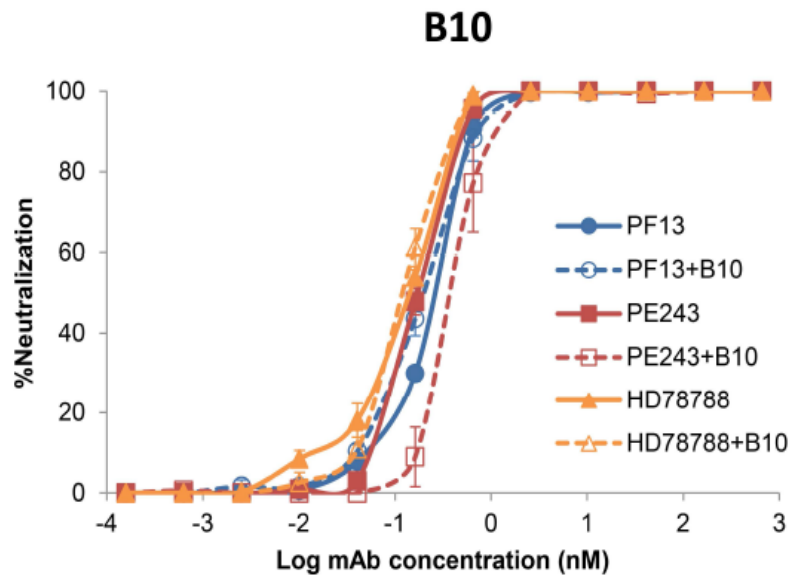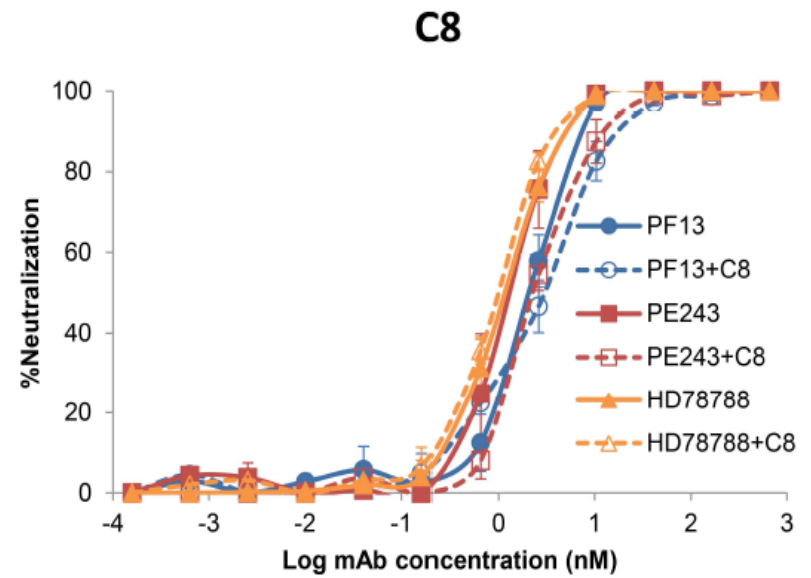

|          | Envelope sequences |       |       |         |       |
|----------|--------------------|-------|-------|---------|-------|
|          | PF13               | PE243 |       | HD78788 |       |
| ZIKV-mAb | L/M212M            | H401Y | -     | I/T156T | -     |
| ZIKV+B10 | L/M212L/M          | -     | K454R | I/T156T | A280V |
| ZIKV+C8  | L/M212M            | -     | -     | I/T156T | -     |

**Figure S5**
